# Supplementary material for: Neurexin–Neuroligin 1 regulates synaptic morphology and functions via the WAVE regulatory complex in Drosophila neuromuscular junction
Source: eLife. 2018 Mar 14;7:e30457. doi: 10.7554/eLife.30457 (PMC5873926; doi:10.7554/eLife.30457)
Supplement: Figure 1—figure supplement 1—source data 1. [file elife-30457-fig1-figsupp1-data1.xlsx]

## Sheet: Sheet1
Figure 1-figure supplement 1-source data 1
Sample size (n), mean, SEM, and Mann–Whitney test in Figure 1-figure supplement 1 D
Relative DLG intensity	n	mean	SEM
WT	17	1	0.058
dnlg1	17	1.021	0.07
dnlg2	17	0.894	0.065
Relative DLG intensity	P-value	summary
	Mann–Whitney test
WT vs. dnlg1	0.79	n.s.
WT vs. dnlg2	0.19	n.s.
