# Supplementary material for: Neurexin–Neuroligin 1 regulates synaptic morphology and functions via the WAVE regulatory complex in Drosophila neuromuscular junction
Source: eLife. 2018 Mar 14;7:e30457. doi: 10.7554/eLife.30457 (PMC5873926; doi:10.7554/eLife.30457)
Supplement: Figure 1—source data 1. [file elife-30457-fig1-data1.xlsx]

## Sheet: Sheet1
Figure 1-source data
Sample size (n), mean, SEM, and One-way ANOVA (and nonparametric) Tukey's multiple comparisons test are presented for the data in Figure 1E & 1F
1E
Relative F-actin area	n	mean	SEM
WT	14	1	0.0716
dnlg1	15	0.842	0.0688
dnlg2	15	0.979	0.0683
dnlg1;dnlg2	16	0.82	0.0382
Relative F-actin area	P-value	summary
Tukey's multiple comparisons test	(One-way ANOVA)
WT vs. dnlg1	0.047	*
WT vs. dnlg2	0.873	n.s.
WT vs. dnlg1;dnlg2	0.0142	*
dnlg1 vs. dnlg1;dnlg2	0.876	n.s.
dnlg2 vs.dnlg1;dnlg2	0.0374	*
1F
Relative F-actin intensity	n	mean	SEM
WT	14	1	0.09
dnlg1	15	0.57	0.101
dnlg2	15	0.47	0.064
dnlg1;dnlg2	16	0.45	0.065
Relative F-actin intensity	P-value	summary
Tukey's multiple comparisons test	(One-way ANOVA)
WT vs. dnlg1	<0.001	***
WT vs. dnlg2	<0.001	***
WT vs. dnlg1;dnlg2	<0.001	***
dnlg1 vs. dnlg1;dnlg2	0.437	n.s.
dnlg2 vs.dnlg1;dnlg2	0.942	n.s.
Relative α-spectrin intensity	n	mean	SEM
WT	14	1	0.076
dnlg1	15	0.58	0.073
dnlg2	16	0.48	0.053
dnlg1;dnlg2	16	0.474	0.105
Relative α-spectrin intensity	P-value	summary
Tukey's multiple comparisons test	(One-way ANOVA)
WT vs. dnlg1	<0.001	***
WT vs. dnlg2	<0.001	***
WT vs. dnlg1;dnlg2	<0.001	***
dnlg1 vs. dnlg1;dnlg2	0.318	n.s.
dnlg2 vs.dnlg1;dnlg2	0.885	n.s.
