# Supplementary material for: Neurexin–Neuroligin 1 regulates synaptic morphology and functions via the WAVE regulatory complex in Drosophila neuromuscular junction
Source: eLife. 2018 Mar 14;7:e30457. doi: 10.7554/eLife.30457 (PMC5873926; doi:10.7554/eLife.30457)
Supplement: Figure 2—source data 1. [file elife-30457-fig2-data1.xlsx]

## Sheet: Sheet1
Figure 2-source data
Sample size (n), mean, SEM, and One-way ANOVA (and nonparametric) Tukey's multiple comparisons test are presented for the data in Figure 2G and 2H
2G
Relative F-actin area	n	mean	SEM
WT	14	1	0.051
dnrx	13	0.837	0.076
OK6-Rescue	16	1.026	0.058
C57-Rescue	17	0.842	0.055
dnlg1;dnrx	17	0.815	0.0958
dnlg2;dnrx	16	0.838	0.034
Relative F-actin area	P-value	summary
Tukey's multiple comparisons test	(One-way ANOVA)
WT vs. dnrx	0.042	*
WT vs. OK6-Rescue	0.781	n.s.
WT vs. C57-Rescue	0.0316	*
WT vs. dnlg1;dnrx	0.0356	*
WT vs. dnlg2;dnrx	0.004	**
dnrx vs. OK6-Rescue	0.011	*
dnrx vs. C57-Rescue	0.62	n.s.
dnrx vs dnlg1;dnrx	0.963	n.s.
dnrx vs dnlg2;dnrx	0.61	n.s.
2H
Relative F-actin intensity	n	mean	SEM
WT	14	1	0.09
dnrx	13	0.54	0.078
OK6-Rescue	16	0.97	0.068
C57-Rescue	17	0.59	0.052
dnlg1;dnrx	17	0.56	0.045
dnlg2;dnrx	16	0.48	0.043
Relative F-actin intensity	P-value	summary
Tukey's multiple comparisons test	(One-way ANOVA)
WT vs. dnrx	<0.001	***
WT vs. OK6-Rescue	0.74	n.s.
WT vs. C57-Rescue	<0.001	***
WT vs. dnlg1;dnrx	<0.001	***
WT vs. dnlg2;dnrx	<0.001	***
dnrx vs. OK6-Rescue	<0.001	***
dnrx vs. C57-Rescue	0.59	n.s.
dnrx vs. dnlg1;dnrx	0.86	n.s.
dnrx vs. dnlg2;dnrx	0.46	n.s.
Relative α-spectrin intensity	n	mean	SEM
WT	14	1	0.075
dnrx	13	0.58	0.069
OK6-Rescue	16	0.998	0.068
C57-Rescue	17	0.607	0.052
dnlg1;dnrx	16	0.54	0.045
dnlg2;dnrx	16	0.54	0.046
Relative α-spectrin intensity	P-value	summary
Tukey's multiple comparisons test	(One-way ANOVA)
WT vs. dnrx	<0.001	***
WT vs. OK6-Rescue	0.988	n.s.
WT vs. C57-Rescue	<0.001	***
WT vs. dnlg1;dnrx	<0.001	***
WT vs. dnlg2;dnrx	<0.001	***
dnrx vs. OK6-Rescue	<0.001	***
dnrx vs. C57-Rescue	0.77	n.s.
dnrx vs. dnlg1;dnrx	0.65	n.s.
dnrx vs. dnlg2;dnrx	0.63	n.s.
