# Supplementary material for: Neurexin–Neuroligin 1 regulates synaptic morphology and functions via the WAVE regulatory complex in Drosophila neuromuscular junction
Source: eLife. 2018 Mar 14;7:e30457. doi: 10.7554/eLife.30457 (PMC5873926; doi:10.7554/eLife.30457)
Supplement: Figure 3—figure supplement 2—source data 1. [file elife-30457-fig3-figsupp2-data1.xlsx]

## Sheet: Sheet1
Figure 3-figure supplement 2-source data 1
Sample size (n), mean, SEM, and One-way ANOVA (and nonparametric) Tukey's multiple comparisons test are presented for the data in Figure 3 figure supplement 2B and 2D
Figure 2B
Relative SCAR level	n	mean	SEM
S2	5	1	0
Ctr-siRNA	5	0.964	0.058
SCAR-siRNA	5	0.224	0.023
Relative SCAR level	P-value	summary
Tukey's multiple comparisons test	(One-way ANOVA)
S2 vs. Ctr-siRNA	0.5595	n.s.
S2 vs. SCAR-si RNA	<0.001	***
Figure 2D
Relative SCAR intensity	n	mean	SEM
S2	27	1	0.048
Ctr-siRNA	28	0.94	0.069
SCAR-siRNA	28	0.212	0.021
Relative SCAR intensity	P-value	summary
Tukey's multiple comparisons test	(One-way ANOVA)
S2 vs. Ctr-siRNA	0.4787	n.s.
S2 vs. SCAR-si RNA	<0.001	***
