# Supplementary material for: Neurexin–Neuroligin 1 regulates synaptic morphology and functions via the WAVE regulatory complex in Drosophila neuromuscular junction
Source: eLife. 2018 Mar 14;7:e30457. doi: 10.7554/eLife.30457 (PMC5873926; doi:10.7554/eLife.30457)
Supplement: Figure 3—source data 1. [file elife-30457-fig3-data1.xlsx]

## Sheet: Sheet1
Figure 3-source data
Sample size (n), mean, SEM, and One-way ANOVA (and nonparametric) Tukey's multiple comparisons test are presented for the data in Figure 3I and 3M
3I
Relative SCAR intensity	n	mean	SEM
WT	12	1	0.029
OK>SCAR RNAi	9	0.967	0.0414
C57>SCAR RNAi	8	0.215	0.034
dnlg1	10	0.537	0.079
dnlg2	10	0.693	0.093
Relative SCAR intensity	P-value	summary
Tukey's multiple comparisons test	(One-way ANOVA)
WT vs. OK6>SCAR RNAi	0.409	n.s.
WT vs. C57>SCAR RNAi	<0.001	***
WT vs. dnlg1	<0.001	***
WT vs. dnlg2	0.0034	**
3M
Fold change of SCAR intensity	n	mean	SEM
WT	24	1.034	0.025
DNlg1 EGFP	27	1.6222	0.08
DNlg1SF-AA EGFP	25	1.0136	0.038
Fold change of SCAR intensity	P-value	summary
Tukey's multiple comparisons test	(One-way ANOVA)
WT vs. DNlg1 EGFP	<0.001	***
WT vs. DNlg1 SF-AA EGFP	0.475	0.612
DNlg1-EGFP vs. DNlg1SF-AA EGFP	<0.001	***
