# Supplementary material for: Neurexin–Neuroligin 1 regulates synaptic morphology and functions via the WAVE regulatory complex in Drosophila neuromuscular junction
Source: eLife. 2018 Mar 14;7:e30457. doi: 10.7554/eLife.30457 (PMC5873926; doi:10.7554/eLife.30457)
Supplement: Figure 4—source data 1. [file elife-30457-fig4-data1.xlsx]

## Sheet: Sheet1
Figure 4-source data
Sample size (n), mean, SEM, and Mann–Whitney test or Student T-test for Figure 4A, 4F, 4G, and 4H
4A
Relative SCAR protein level	n	mean	SEM
WT	3	1	0
Elav>SCAR RNAi	3	0.187	0.027
Relative SCAR protein level	P-value	summary
	Mann–Whitney test
WT vs. Elav>SCAR RNAi	<0.001	***
4F
Relative F-actin area	n	mean	SEM
WT	14	1	0.05
24B>SCAR RNAi	15	0.83	0.084
Relative F-actin area	P-value	summary
	Student T-test
WT vs.24B>SCAR RNAi	0.031	*
4G
Relative F-actin intensity	n	mean	SEM
WT	14	1	0.0901
24B>SCAR RNAi	14	0.603	0.046
Relative F-actin intensity	P-value	summary
	Student T-test
WT vs.24B>SCAR RNAi	<0.001	***
Relative α-spectrin intensity	n	mean	SEM
WT	14	1	0.079
24B>SCAR RNAi	14	0.543	0.067
Relative α-spectrin intensity	P-value	summary
	Student T-test
WT vs.24B>SCAR RNAi	<0.001	***
4H
bouton number	n	mean	SEM
WT	17	104	2.8
24B>SCAR RNAi	16	83.8	3.2
bouton number	P-value	summary
	Student T-test
WT vs.24B>SCAR RNAi	<0.001	***
