# Supplementary material for: Neurexin–Neuroligin 1 regulates synaptic morphology and functions via the WAVE regulatory complex in Drosophila neuromuscular junction
Source: eLife. 2018 Mar 14;7:e30457. doi: 10.7554/eLife.30457 (PMC5873926; doi:10.7554/eLife.30457)
Supplement: Figure 5—source data 1. [file elife-30457-fig5-data1.xlsx]

## Sheet: Sheet1
Figure 5-source data
Sample size (n), mean, SEM, and One-way ANOVA (and nonparametric) Tukey's multiple comparisons test are presented for the data in Figure 5I, 5J and 5K
5I
Relative SCAR intensity	n	mean	SEM
WT	13	1	0.048
dnlg1	12	0.572	0.026
Rescue-WT	10	0.949	0.041
Rescue-AA	9	0.615	0.028
Relative SCAR intensity	P-value	summary
Tukey's multiple comparisons test	(One-way ANOVA)
WT vs. dnlg1	<0.001	***
WT vs. Rescue-WT	0.726	n.s.
WT vs. Rescue-AA	<0.001	***
dnlg1 vs. Rescue-WT	<0.001	***
dnlg1 vs. Rescue-AA	0.131	n.s.
5J
Relative F-actin area	n	mean	SEM
WT	16	1	0.0412
dnlg1	16	0.805	0.0768
Rescue-WT	20	1.032	0.0261
Rescue-AA	18	0.789	0.0465
Relative F-actin area	P-value	summary
Tukey's multiple comparisons test	(One-way ANOVA)
WT vs. dnlg1	0.0289	*
WT vs. Rescue-WT	0.952	n.s.
WT vs. Rescue-AA	0.0116	*
dnlg1 vs. Rescue-WT	0.0013	**
dnlg1 vs. Rescue-AA	0.917	n.s.
5K
Relative F-actin intensity	n	mean	SEM
WT	16	1	0.09
dnlg1	16	0.583	0.042
Rescue-WT	20	0.965	0.032
Rescue-AA	18	0.64	0.041
Relative F-actin intensity	P-value	summary
Tukey's multiple comparisons test	(One-way ANOVA)
WT vs. dnlg1	<0.001	***
WT vs. Rescue-WT	0.871	n.s.
WT vs. Rescue-AA	<0.001	***
dnlg1 vs. Rescue-WT	<0.001	***
dnlg1 vs. Rescue-AA	0.0947	n.s.
Relative α-spectrin intensity	n	mean	SEM
WT	16	1	0.076
dnlg1	17	0.415	0.058
Rescue-WT	21	0.932	0.0803
Rescue-AA	17	0.57	0.018
Relative α-spectrin intensity	P-value	summary
Tukey's multiple comparisons test	(One-way ANOVA)
WT vs. dnlg1	<0.001	***
WT vs. Rescue-WT	0.652	n.s.
WT vs. Rescue-AA	<0.001	***
dnlg1 vs. Rescue-WT	<0.001	***
dnlg1 vs. Rescue-AA	0.0687	n.s.
