# Supplementary material for: Neurexin–Neuroligin 1 regulates synaptic morphology and functions via the WAVE regulatory complex in Drosophila neuromuscular junction
Source: eLife. 2018 Mar 14;7:e30457. doi: 10.7554/eLife.30457 (PMC5873926; doi:10.7554/eLife.30457)
Supplement: Figure 6—figure supplement 1—source data 1. [file elife-30457-fig6-figsupp1-data1.xlsx]

## Sheet: Sheet1
Figure 6 figure supplement 1-source data 1
Sample size (n), mean, SEM, One-way ANOVA (and nonparametric) Tukey's multiple comparisons test are presented for the data in Figures 6 figure supplement 1B and 1D
Normalized GluRIIA intensity	n	mean	SEM
WT	30	1	0.03817
dnlg1	22	1.002	0.0517
rescue-WT	24	0.9481	0.07569
rescue-AA	29	0.9041	0.0656
Normalized GluRIIA intensity	Adjusted P Value	Summary
Tukey's multiple comparisons test	(One-way ANOVA)
WT vs. dnlg1	>0.9999	n.s.
WT vs. rescue-AA	0.614	n.s.
WTvs. rescue-WT	0.9222	n.s.
dnlg1 vs. rescue-AA	0.6603	n.s.
dnlg1 vs. rescue-WT	0.9299	n.s.
rescue-AA vs. rescue-WT	0.9519	n.s.
Normalized GluRIIB intensity	n	mean	SEM
WT	48	0.9912	0.07541
dnlg1	29	0.9826	0.0592
rescue-WT	25	0.9561	0.05872
rescue-AA	41	1.133	0.06953
Normalized GluIIRB intensity	Adjusted P Value	Summary
Tukey's multiple comparisons test	(One-way ANOVA)
WT vs. dnlg1	0.9998	n.s.
WT vs. rescue-AA	0.4105	n.s.
WTvs. rescue-WT	0.9874	n.s.
dnlg1 vs. rescue-AA	0.4759	n.s.
dnlg1 vs. rescue-WT	0.9959	n.s.
rescue-AA vs. rescue-WT	0.3702	n.s.
