# Supplementary material for: Neurexin–Neuroligin 1 regulates synaptic morphology and functions via the WAVE regulatory complex in Drosophila neuromuscular junction
Source: eLife. 2018 Mar 14;7:e30457. doi: 10.7554/eLife.30457 (PMC5873926; doi:10.7554/eLife.30457)
Supplement: Figure 6—source data 1. [file elife-30457-fig6-data1.xlsx]

## Sheet: Sheet1
Figure 6-source data 1
Sample size (n), mean, SEM, and One-way ANOVA (and nonparametric) Tukey's multiple comparisons test are presented for the data in Figures 6A, 6C,6F,6I, and6J
6A
EJP amplitude (mV)	n	mean	SEM
WT	16	36.26	0.79088
dnlg1	19	25.89	0.68712
rescue-WT	13	30.88	1.58802
rescue-AA	20	25.16	1.05026
EJP amplitude (mV)	Adjusted P Value	Summary
Tukey's multiple comparisons test	(One-way ANOVA)
WT vs. dnlg1	<0.0001	****
WT vs. rescue-AA	<0.0001	****
WTvs. rescue-WT	0.0056	**
dnlg1 vs. rescue-AA	0.948	n.s.
dnlg1 vs. rescue-WT	0.0082	**
rescue-AA vs. rescue-WT	0.0016	**
6C
mEJP frequency (Hz)	n	mean	SEM
WT	16	1.025	0.08165
dnlg1	19	0.5395	0.03738
rescue-WT	14	0.8429	0.1103
rescue-AA	17	0.4412	0.0582
mEJP frequency (Hz)	Adjusted P Value	Summary
Tukey's multiple comparisons test	(One-way ANOVA)
WT vs. dnlg1	<0.0001	****
WT vs. rescue-AA	<0.0001	****
WTvs. rescue-WT	0.324	n.s.
dnlg1 vs. rescue-AA	0.7411	n.s.
dnlg1 vs. rescue-WT	0.0214	*
rescue-AA vs. rescue-WT	0.0016	**
6F
Bouton number (NMJ6/7)	n	mean	SEM
WT	21	105.4	4.58542
dnlg1	25	71.68	2.07342
rescue-WT	19	94.37	5.45701
rescue-AA	23	75.78	1.95195
Bouton number (NMJ6/7)	Adjusted P Value	Summary
Tukey's multiple comparisons test	(One-way ANOVA)
WT vs. dnlg1	<0.0001	****
WT vs. rescue-AA	<0.0001	****
WTvs. rescue-WT	0.0798	n.s.
dnlg1 vs. rescue-AA	0.3986	n.s.
dnlg1 vs. rescue-WT	0.0001	***
rescue-AA vs. rescue-WT	0.0017	**
6I
Unapposed Active Zone (NMJ4) (%)	n	mean	SEM
WT	16	6.159	1.774
dnlg1	16	24.34	2.262
rescue-WT	18	10.37	2.201
rescue-AA	13	19.22	3.117
Unapposed Active Zone (NMJ4) (%)	Adjusted P Value	Summary
Tukey's multiple comparisons test	(One-way ANOVA)
WT vs. dnlg1	<0.0001	****
WT vs. rescue-AA	0.0019	**
WTvs. rescue-WT	0.7316	n.s.
dnlg1 vs. rescue-AA	0.5749	n.s.
dnlg1 vs. rescue-WT	0.0003	***
rescue-AA vs. rescue-WT	0.0689	n.s.
6J
Orphan bouton (NMJ4) (%)	n	mean	SEM
WT	21	0.4762	0.4762
dnlg1	25	11.33	2.568
rescue-WT	19	0.3704	0.3704
rescue-AA	23	0.3803	0.2667
Orphan bouton (NMJ4) (%)	Adjusted P Value	Summary
Tukey's multiple comparisons test	(One-way ANOVA)
WT vs. dnlg1	<0.0001	****
WT vs. rescue-AA	>0.9999	n.s.
WTvs. rescue-WT	>0.9999	n.s.
dnlg1 vs. rescue-AA	<0.0001	****
dnlg1 vs. rescue-WT	<0.0001	****
rescue-AA vs. rescue-WT	>0.9999	ns
