# Supplementary material for: Neurexin–Neuroligin 1 regulates synaptic morphology and functions via the WAVE regulatory complex in Drosophila neuromuscular junction
Source: eLife. 2018 Mar 14;7:e30457. doi: 10.7554/eLife.30457 (PMC5873926; doi:10.7554/eLife.30457)
Supplement: Figure 7—source data 1. [file elife-30457-fig7-data1.xlsx]

## Sheet: Sheet1
Figure 7-source data
Sample size (n), mean, SEM, and One-way ANOVA (and nonparametric) Tukey's multiple comparisons test are presented for the data in Figure 7G
Fold change of F-actin intensity	n	mean	SEM
WT	10	1	0.045
Mef2>DNlg1-EGFP	10	3.528	0.272
Mef2>DNlg1SF-AA-EGFP	10	1.052	0.049
Fold change of F-actin intensity	P-value	summary
Tukey's multiple comparisons test	(One-way ANOVA)
WT vs. Mef2>DNlg1-EGFP	<0.001	***
WT vs. Mef2>DNlg1SF-AA-EGFP	0.8566	n.s.
Mef2>DNlg1-EGFP vs. Mef2>DNlg1SF-AA-EGFP	<0.001	***
