# Supplementary material for: Neurexin–Neuroligin 1 regulates synaptic morphology and functions via the WAVE regulatory complex in Drosophila neuromuscular junction
Source: eLife. 2018 Mar 14;7:e30457. doi: 10.7554/eLife.30457 (PMC5873926; doi:10.7554/eLife.30457)
Supplement: Figure 8—source data 1. [file elife-30457-fig8-data1.xlsx]

## Sheet: Sheet1
Figure 8-source data
Sample size (n), mean, SEM, and One-way ANOVA (and nonparametric) Tukey's multiple comparisons test are presented for the data in Figure 8G
Fold change of SCAR intensity	n	mean	SEM
WT	14	0.999	0.042
Mef2>DNlg1-EGFP	14	2.556	0.192
Mef2>DNlg1SF-AA-EGFP	14	1.12	0.051
Fold change of SCAR intensity	P-value	summary
Tukey's multiple comparisons test	(One-way ANOVA)
WT vs. Mef2>DNlg1-EGFP	<0.001	***
WT vs. Mef2>DNlg1SF-AA-EGFP	0.066	n.s.
Mef2>DNlg1-EGFP vs. Mef2>DNlg1SF-AA-EGFP	<0.001	***
