# Supplementary figures and images for: Neurexin–Neuroligin 1 regulates synaptic morphology and functions via the WAVE regulatory complex in Drosophila neuromuscular junction
Source: eLife journal article supplement (doi:10.7554/elife.30457), 2018-03-14

Figure 6-figure supplement 1

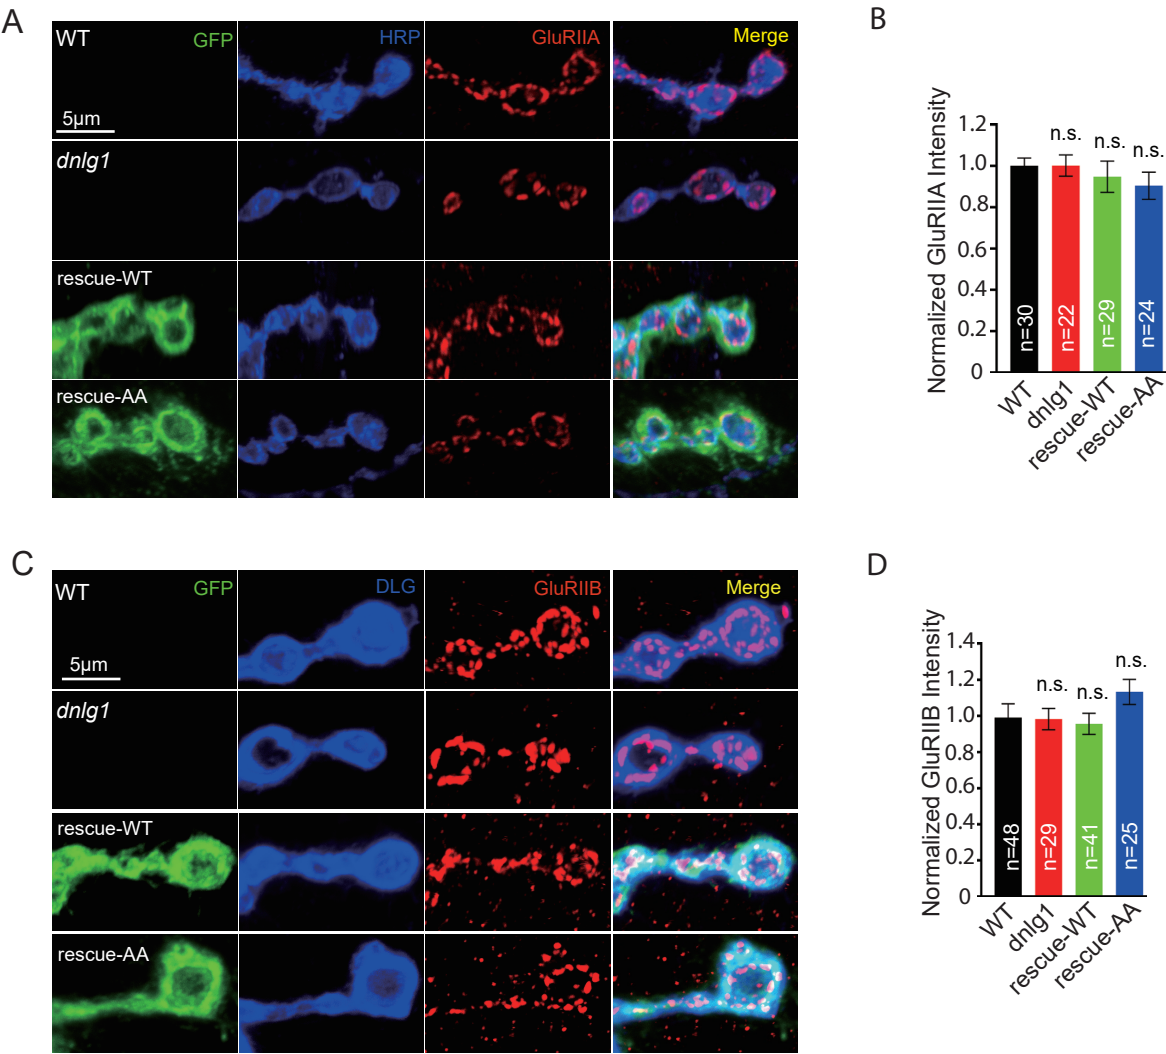

Supplement: supp [file elife-30457-supp-v1.zip]

Figure 5-figure supplement 1

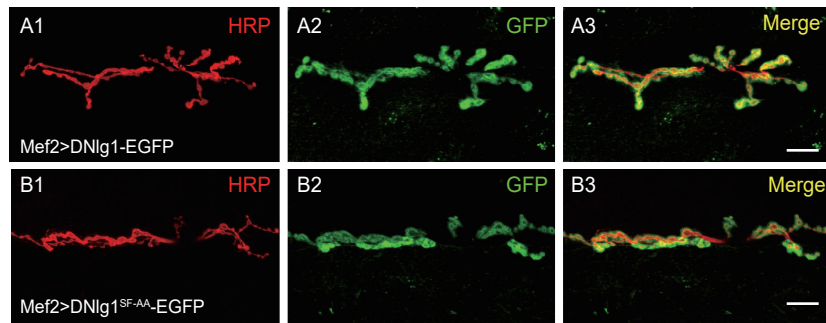

Supplement: supp [file elife-30457-supp-v1.zip]

Figure 3-figure supplement 1

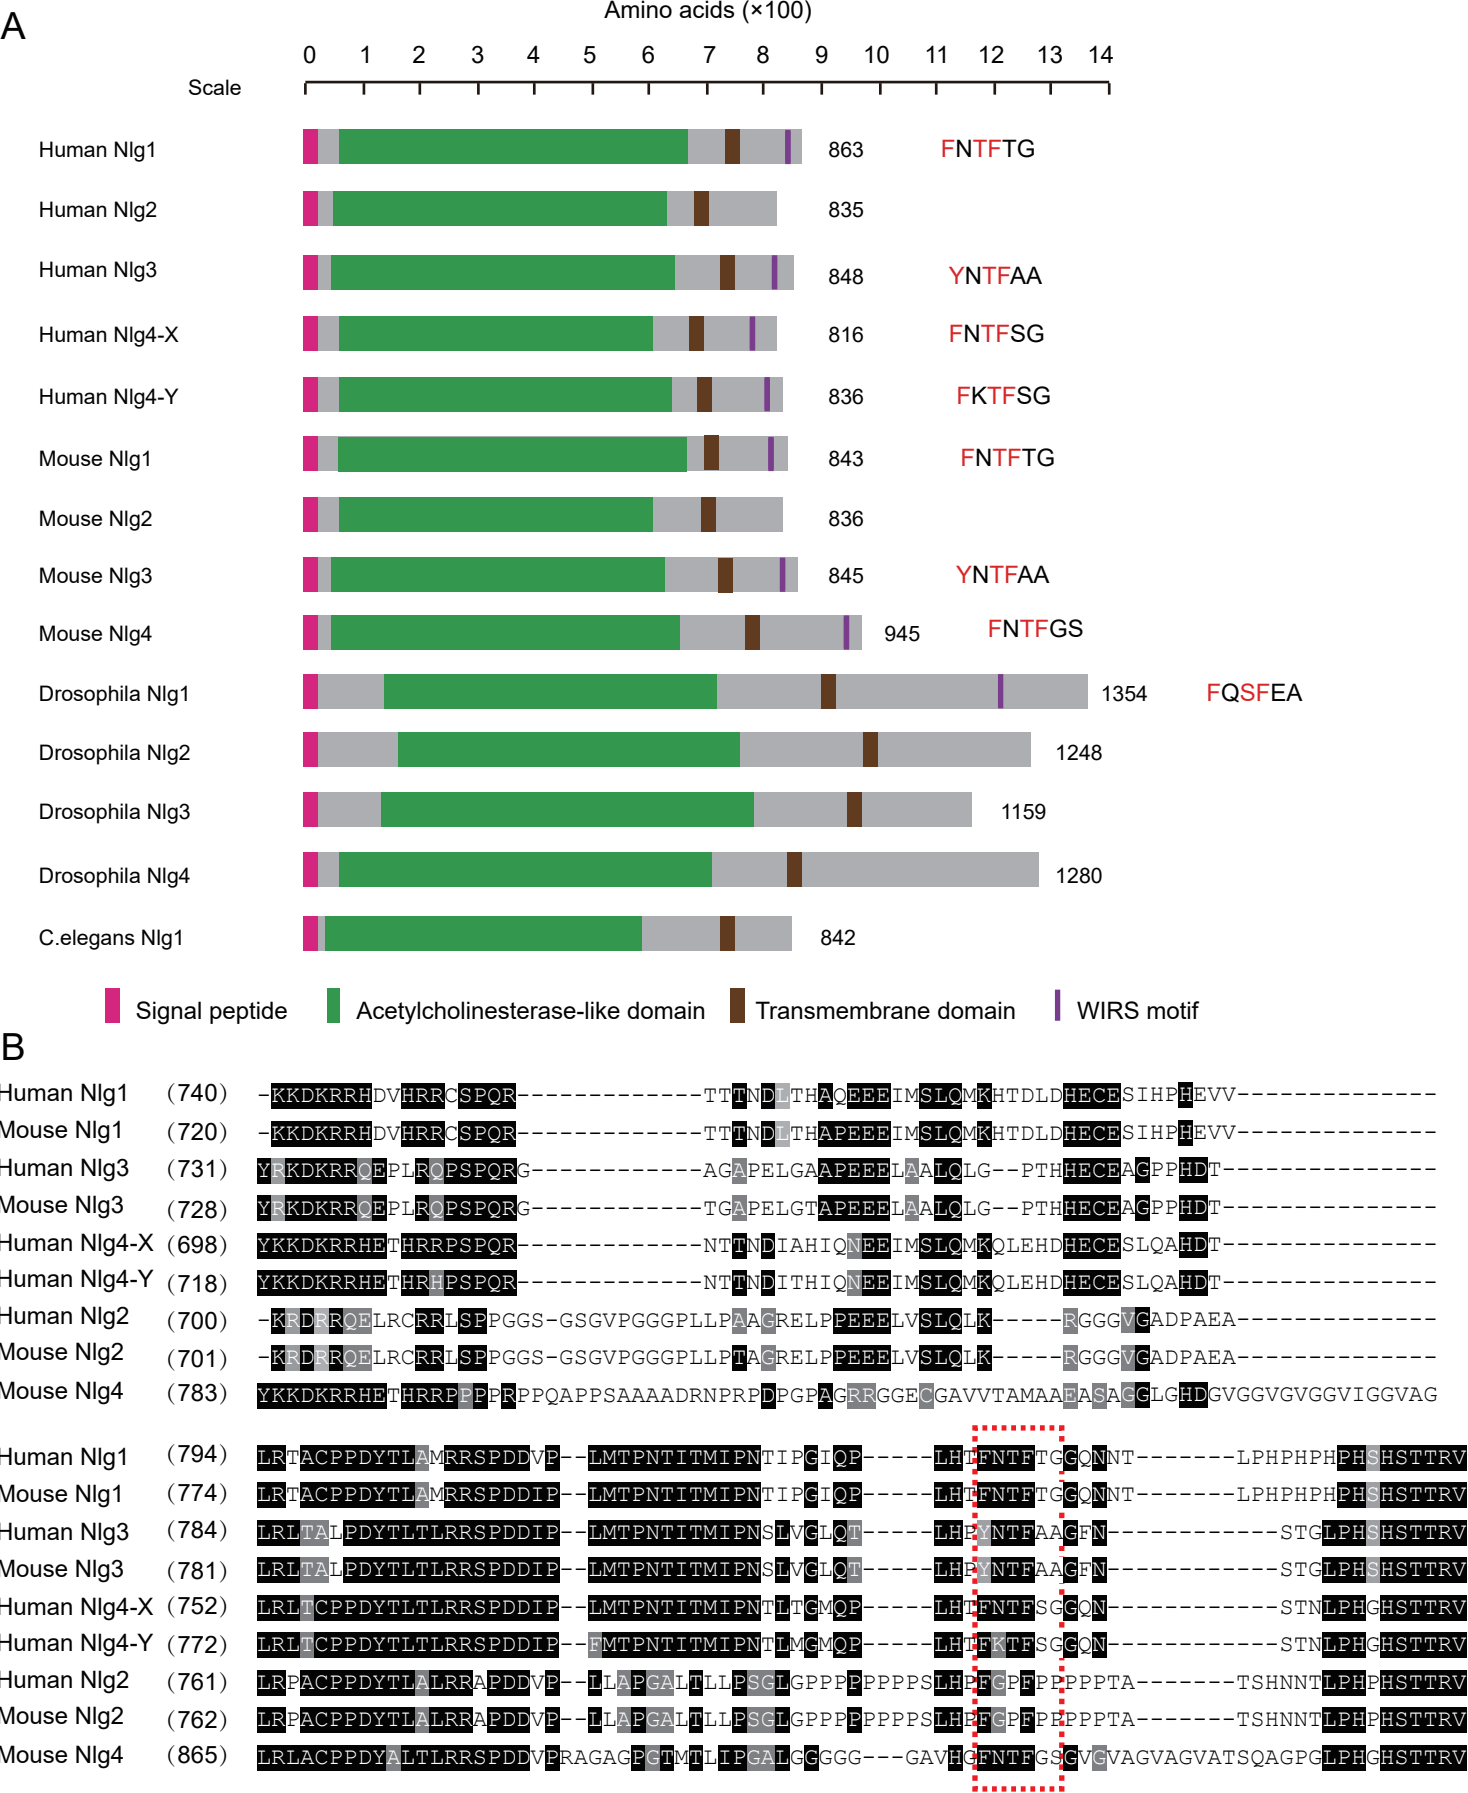

Supplement: supp [file elife-30457-supp-v1.zip]

Figure 1-Figure supplement 1

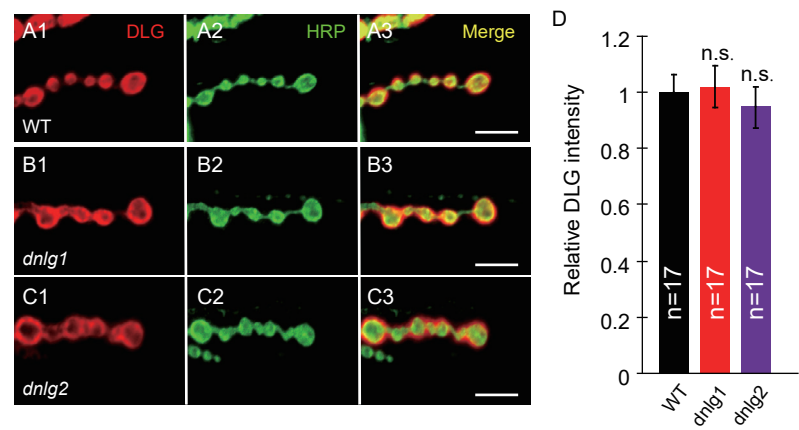

Supplement: supp [file elife-30457-supp-v1.zip]

Figure 3-figure supplement 2

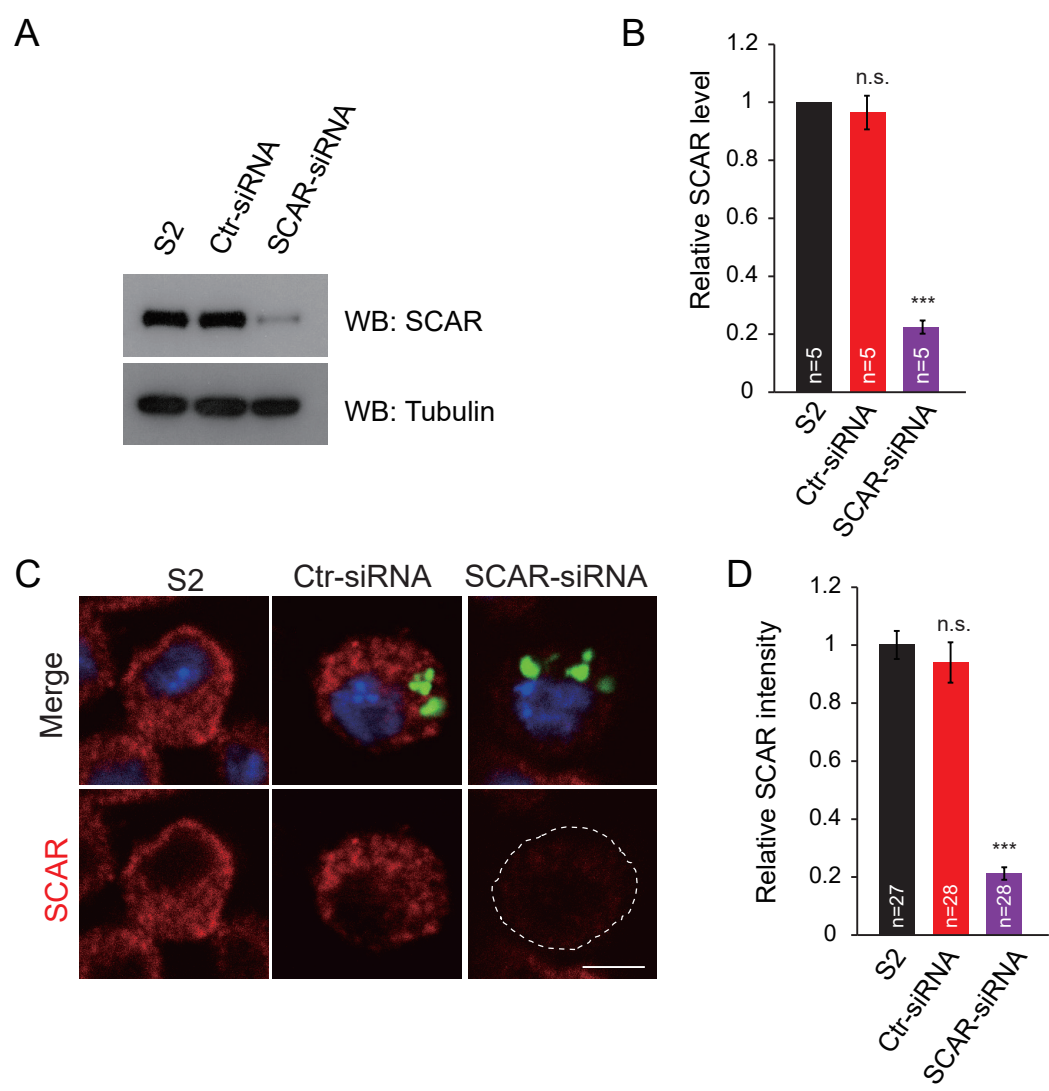

Supplement: supp [file elife-30457-supp-v1.zip]
